# Supplementary material for: Ion-paired antibiotics in PLGA nanoparticles: improving encapsulation efficiency and musculoskeletal infection treatment
Source: Royal Society of Chemistry journal article supplement (doi:10.1039/d5ra04263a), 2025-01-01

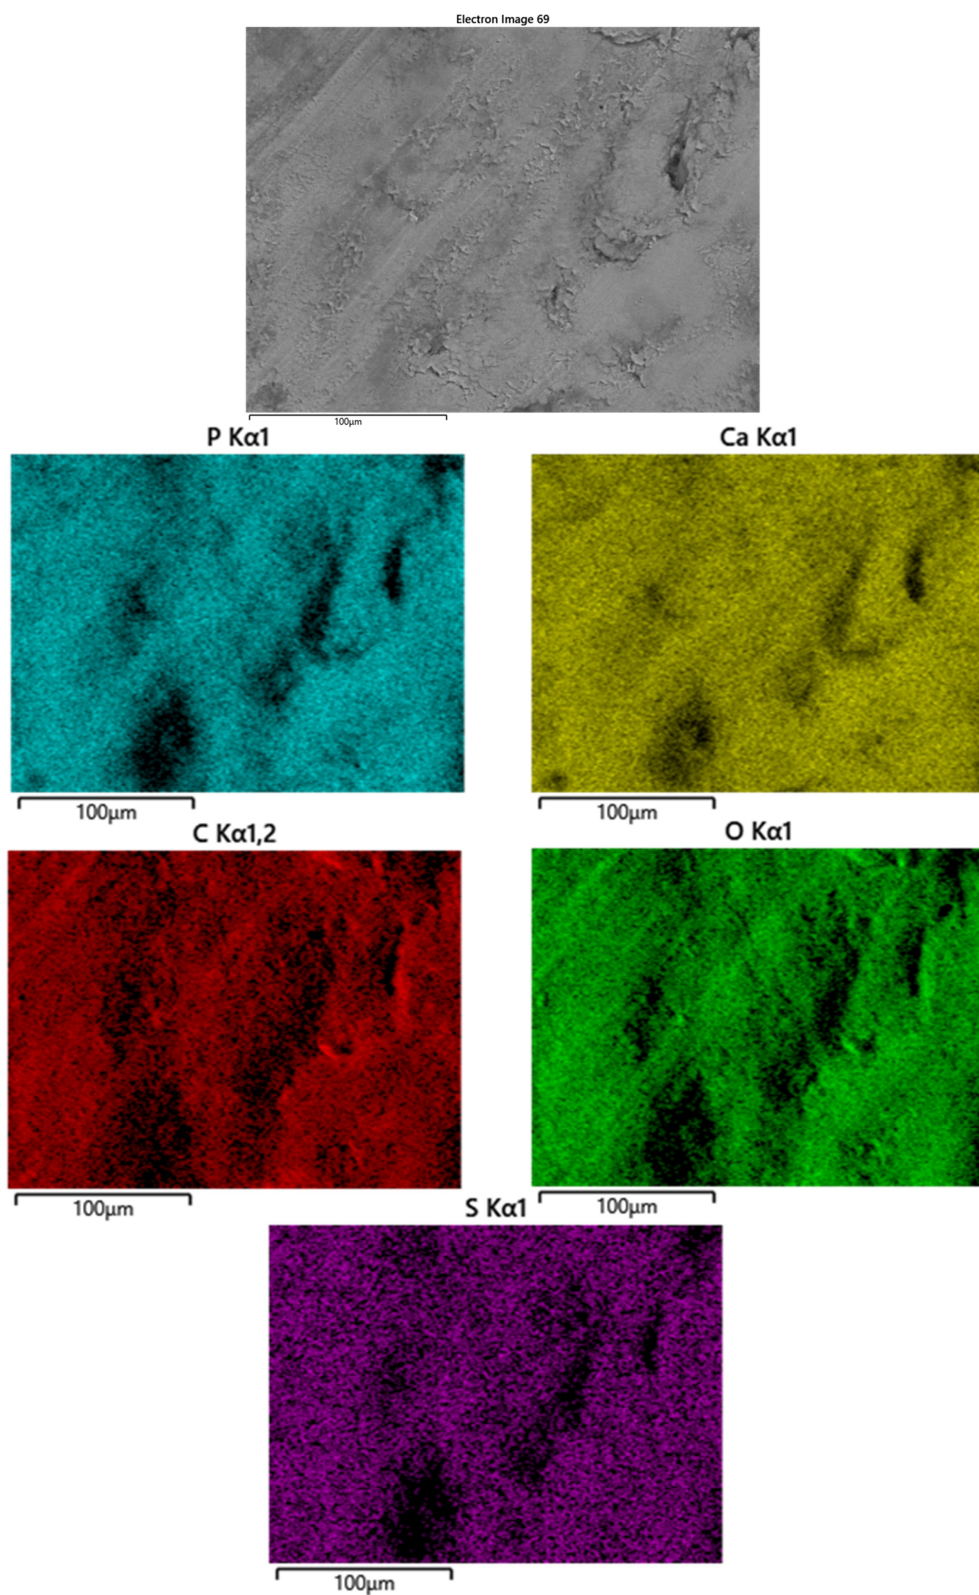

Supplement: d5ra04263a9.pdf [file d5ra04263a9.pdf]
